# Supplementary material for: A Mechanical Model for Stress Relaxation of Polylactic Acid/Thermoplastic Polyurethane Blends
Source: MDPI journal article supplement (doi:10.3390/jcs8050169), 2024-05-01
Supplement: s1 [file s1]

## Supplementary Information

### A Mechanical Model for Stress relaxation of Polylactic Acid/Thermoplastic Polyurethane Blends

Yi-Sheng Jhao<sup>1)</sup>, Hao Ouyang<sup>1)</sup>, Chien-Chao Huang<sup>2)</sup>, Fuqian Yang<sup>3)</sup>, Sanboh Lee<sup>1)</sup>\*

<sup>1</sup> Department of Materials Science and Engineering, National Tsing Hua University, Hsinchu 300, Taiwan

<sup>2</sup> College of Semiconductor Research, National Tsing Hua University, Hsinchu 300, Taiwan

<sup>3</sup> Materials Program, Department of Chemical and Materials Engineering, University of Kentucky, Lexington, KY, 40506, USA

\* Correspondence: sblee@mx.nthu.edu.tw; Tel.: 886-3-5719677

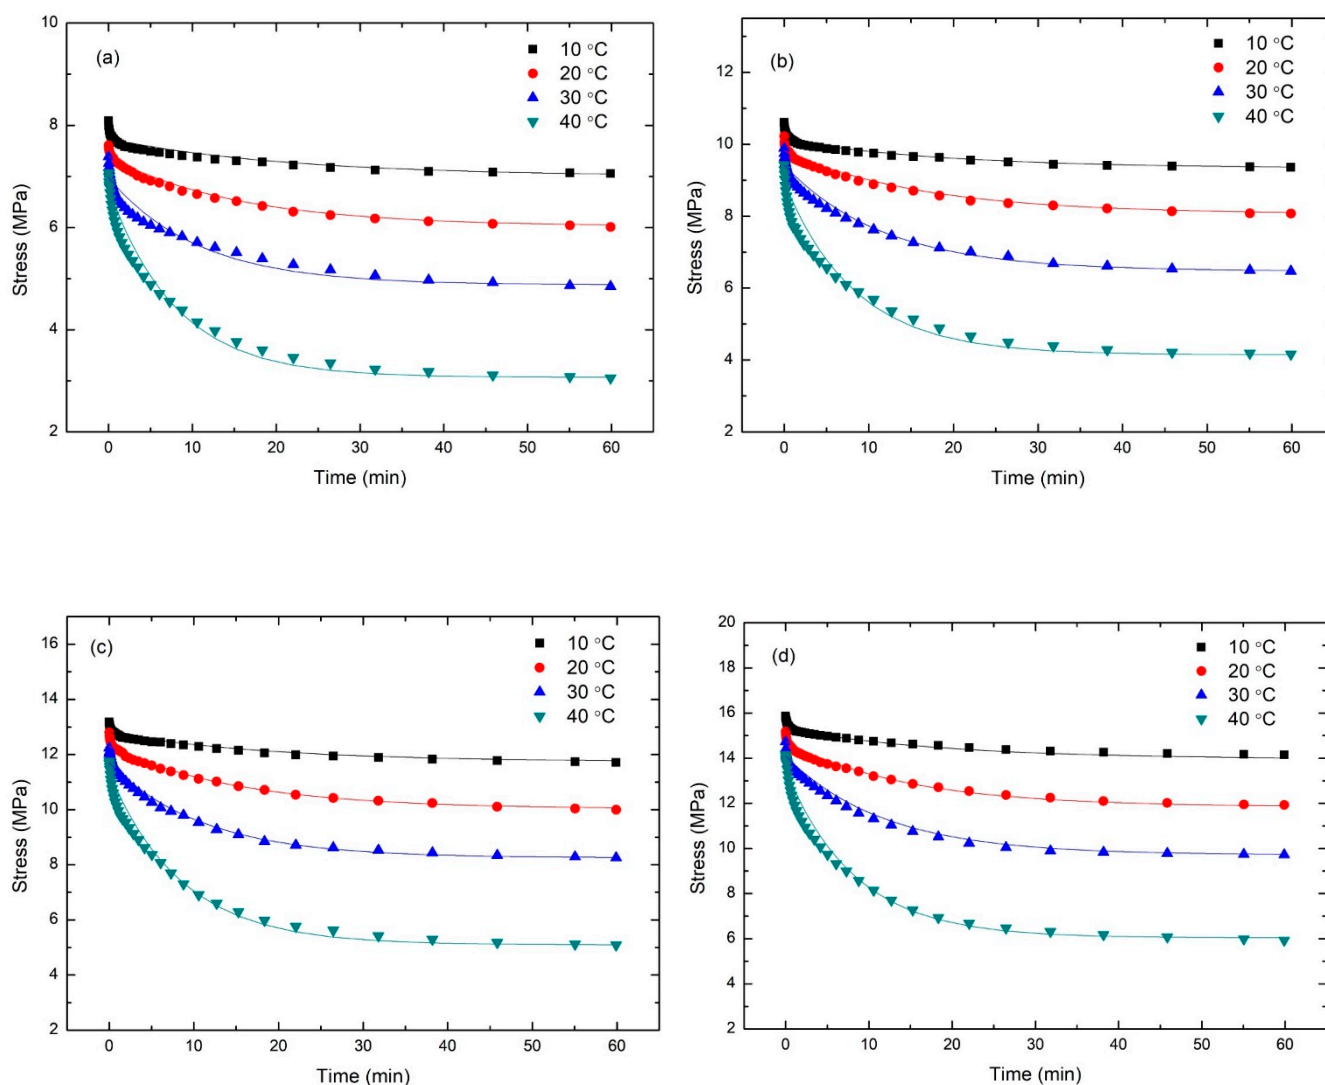

Figure S1. The stress relaxation of PLA (or the mass ratio of PLA to TPU: 100/0) at different temperatures under the applied strains of (a) 0.3 %, (b) 0.4 %, (c) 0.5 %, and (d) 0.6 %.

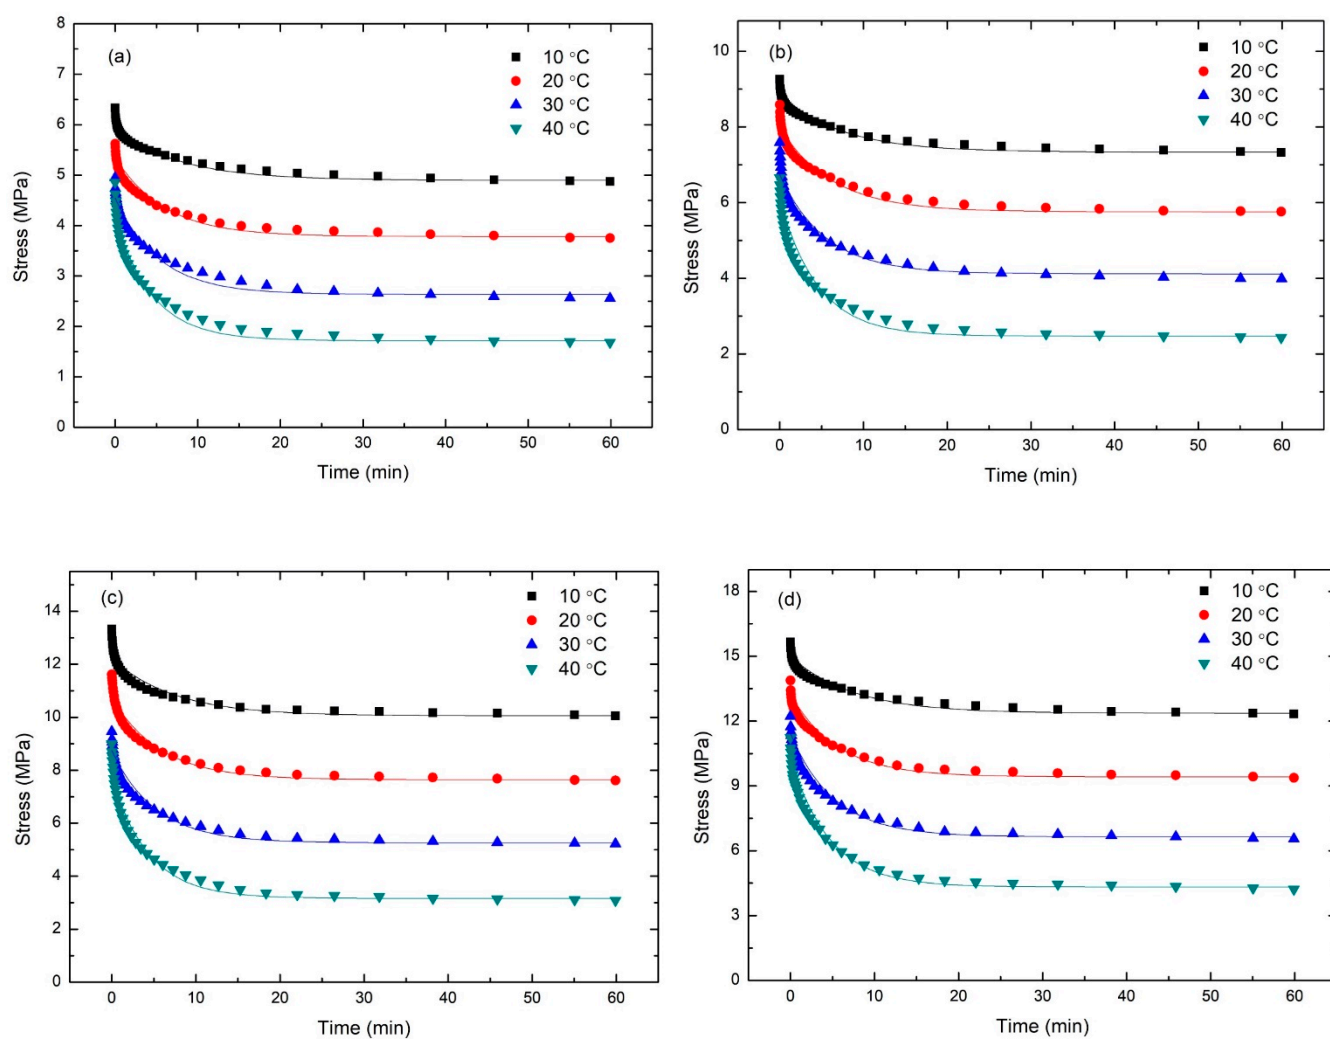

Figure S2. The stress relaxation of PLA/TPU blend with 50/50 for the mass ratio of PLA to TPU at different temperatures under the applied strains of (a) 0.6 %, (b) 0.9 %, (c) 1.2 %, and (d) 1.5 %.

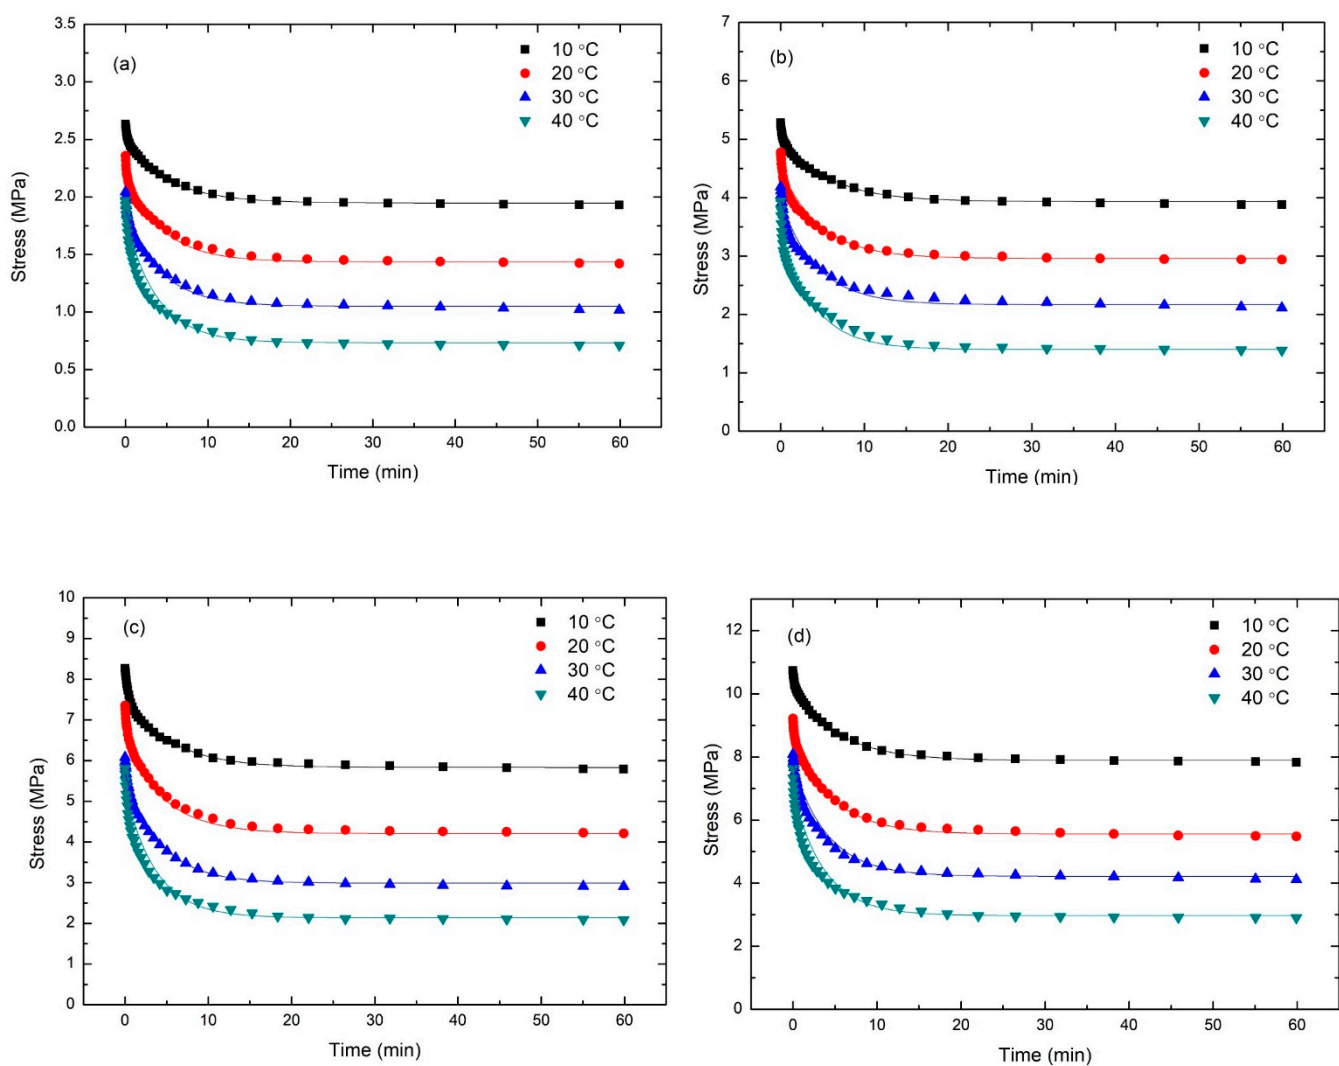

Figure S3. The stress relaxation of PLA/TPU blend with 30/70 for the mass ratio of PA to TPU at different temperatures under the applied strains of (a) 0.6 %, (b) 1.2 %, (c) 1.8 %, and (d) 2.4 %.

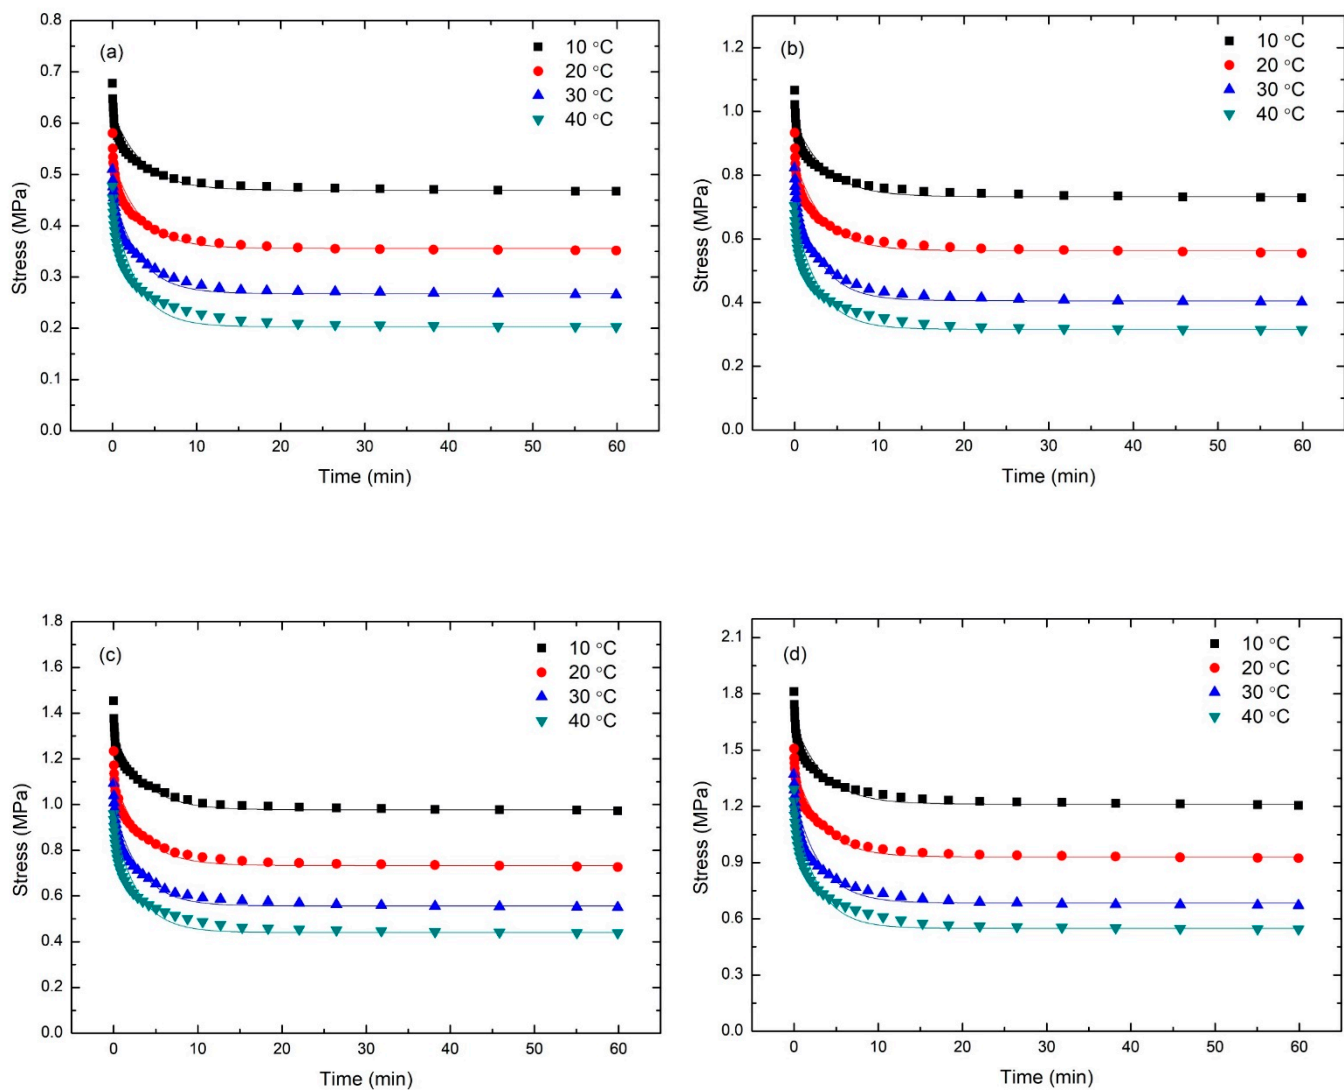

Figure S4. The stress relaxation of TPU (or the mass ratio of PLA to TPU: 0/100) at different temperatures under the applied strains of (a) 1.8 %, (b) 2.8 %, (c) 3.8 %, and (d) 4.8 %.

Table S1. The glass transition temperatures of  $T_{g,1}$  and  $T_{g,2}$  of PLA/TPU blends with different ratios of PLA to TPU.

| PLA/TPU                     | 100/0 | 70/30 | 50/50 | 30/70 | 0/100 |
|-----------------------------|-------|-------|-------|-------|-------|
| $T_{g,1}(^{\circ}\text{C})$ | -     | -20.6 | -20.8 | -21.0 | -23.2 |
| $T_{g,2}(^{\circ}\text{C})$ | 68.3  | 67.5  | 67.1- | 67.0  | -     |

Table S2. SLSM mechanical constants  $E_1$ ,  $E_2$ , and  $\eta_2$  of PLA (100/0 for the mass ratio of PLA to TPU) at different temperatures.

| Temperature        | 10 $^{\circ}\text{C}$ | 20 $^{\circ}\text{C}$ | 30 $^{\circ}\text{C}$ | 40 $^{\circ}\text{C}$ |
|--------------------|-----------------------|-----------------------|-----------------------|-----------------------|
| $E_1$ (GPa)        | $2.56 \pm 0.11$       | $2.46 \pm 0.09$       | $2.34 \pm 0.09$       | $2.25 \pm 0.07$       |
| $E_2$ (GPa)        | $27.1 \pm 1.1$        | $10.8 \pm 0.7$        | $5.33 \pm 0.19$       | $1.80 \pm 0.11$       |
| $\eta_2$ (GPa•min) | $579 \pm 25$          | $202 \pm 11$          | $86.9 \pm 2.4$        | $34.2 \pm 1.1$        |

Table S3. SLSM mechanical constants  $E_1$ ,  $E_2$ , and  $\eta_2$  of PLA/TPU blend with 50/50 for the mass ratio of PLA to TPU at different temperatures.

|                    | 10 $^{\circ}\text{C}$ | 20 $^{\circ}\text{C}$ | 30 $^{\circ}\text{C}$ | 40 $^{\circ}\text{C}$ |
|--------------------|-----------------------|-----------------------|-----------------------|-----------------------|
| $E_1$ (GPa)        | $0.995 \pm 0.031$     | $0.890 \pm 0.052$     | $0.750 \pm 0.022$     | $0.676 \pm 0.0025$    |
| $E_2$ (GPa)        | $4.67 \pm 0.19$       | $2.20 \pm 0.09$       | $1.09 \pm 0.07$       | $0.473 \pm 0.027$     |
| $\eta_2$ (GPa•min) | $42.2 \pm 2.4$        | $18.1 \pm 0.5$        | $9.74 \pm 0.48$       | $5.20 \pm 0.33$       |
| $R^2$              | 0.958                 | 0.961                 | 0.965                 | 0.960                 |

Table S4. SLSM mechanical constants  $E_1$ ,  $E_2$ , and  $\eta_2$  of PLA/TPU blend with 30/70 for the mass ratio of PLA to TPU at different temperatures.

|                    | 10 °C             | 20 °C             | 30 °C             | 40 °C             |
|--------------------|-------------------|-------------------|-------------------|-------------------|
| $E_1$ (GPa)        | $0.425 \pm 0.031$ | $0.367 \pm 0.011$ | $0.321 \pm 0.018$ | $0.293 \pm 0.014$ |
| $E_2$ (GPa)        | $1.41 \pm 0.08$   | $0.676 \pm 0.027$ | $0.382 \pm 0.024$ | $0.204 \pm 0.012$ |
| $\eta_2$ (GPa•min) | $9.54 \pm 0.42$   | $4.75 \pm 0.18$   | $2.94 \pm 0.16$   | $1.88 \pm 0.01$   |

Table S5. SLSM mechanical constants  $E_1$ ,  $E_2$ , and  $\eta_2$  of TPU (or 0/100 for the mass ratio of PLA to TPU) at different temperatures.

|                    | 10 °C             | 20 °C             | 30 °C             | 40 °C             |
|--------------------|-------------------|-------------------|-------------------|-------------------|
| $E_1$ (MPa)        | $34.6 \pm 1.1$    | $29.7 \pm 1.2$    | $26.3 \pm 0.7$    | $24.4 \pm 0.9$    |
| $E_2$ (MPa)        | $101 \pm 6$       | $57.9 \pm 2.1$    | $32.7 \pm 1.7$    | $21.2 \pm 1.1$    |
| $\eta_2$ (GPa•min) | $0.481 \pm 0.027$ | $0.284 \pm 0.011$ | $0.180 \pm 0.013$ | $0.131 \pm 0.007$ |
